# Supplementary material for: Does the Lightning Process Training Programme Reduce Chronic Fatigue in Adolescent and Young Adult Cancer Survivors? A Mixed-Methods Pilot Study
Source: MDPI journal article supplement (doi:10.3390/cancers13164076), 2021-08-13
Supplement: s1 [file s1]

## Supplementary Materials

# Does the Lightning Process Training Programme Reduce Chronic Fatigue in Adolescent and Young Adult Cancer Survivors? A Mixed-Methods Pilot Study

Lena Fauske, Øyvind S. Bruland, Alv A. Dahl, Aase Myklebostad and Silje E. Reme

**Table S1.** The Fatigue Questionnaire: total fatigue.

| Patient No.      | TF Baseline | TF 3 Months | Change B → 3 * | TF 6 Months | Change B → 6 * | Change 3 → 6 ** |
|------------------|-------------|-------------|----------------|-------------|----------------|-----------------|
| 1                | 22          | 9           | Yes            | 12          | Yes            | No              |
| 2                | 27          | 7           | Yes            | 5           | Yes            | No              |
| 3                | 22          | 9           | Yes            | 8           | Yes            | No              |
| 4                | 21          | 5           | Yes            | 4           | Yes            | No              |
| 5                | 29          | 7           | Yes            | 9           | Yes            | No              |
| 6                | 24          | 15          | Yes            | 19          | Yes            | Yes, worse      |
| 7                | 30          | 29          | No             | 30          | No             | No              |
| 8                | 28          | -           | -              | -           | -              | -               |
| 9                | 25          | 20          | Yes            | 15          | Yes            | Yes, improved   |
| 10               | 19          | 7           | Yes            | 17          | No             | Yes, improved   |
| 11               | 28          | 6           | Yes            | 2           | Yes            | Yes, improved   |
| 12               | 20          | 7           | Yes            | 5           | Yes            | No              |
| 13               | 12          | 13          | Yes            | -           | -              | -               |
| <b>Mean (SD)</b> | 23 (5)      | 11 (7)      | $p < 0.001$    | 12 (8)      | $p < 0.001$    | $p = 0.73$      |

TF: total fatigue; SD: standard deviation; →: from baseline (B) to actual month; \* More than 0.5 SD at baseline = 2.55; \*\* More than 0.5 SD at 3 months = 3.55.

**Table S2.** The Patient Health Questionnaire: sum score.

| Patient No.      | PHQ-9 at Baseline | PHQ-9 at 3 Months | Change B → 3 * | PHQ-9 at 6 Months | Change B → 6* | Change 3 → 6** |
|------------------|-------------------|-------------------|----------------|-------------------|---------------|----------------|
| 1                | 12                | 10                | No             | 11                | No            | No             |
| 2                | 9                 | 5                 | Yes            | 3                 | Yes           | Yes            |
| 3                | 17                | 13                | Yes            | 7                 | Yes           | Yes            |
| 4                | 13                | 3                 | Yes            | 3                 | Yes           | No             |
| 5                | 18                | 11                | Yes            | 8                 | Yes           | Yes            |
| 6                | 20                | 6                 | Yes            | 18                | Yes           | Yes            |
| 7                | 13                | 11                | No             | 11                | No            | No             |
| 8                | 21                | -                 | -              | -                 | -             | -              |
| 9                | 16                | 7                 | Yes            | 10                | Yes           | Yes            |
| 10               | 12                | 3                 | Yes            | 10                | No            | Yes            |
| 11               | 23                | 9                 | Yes            | 9                 | Yes           | No             |
| 12               | 12                | 5                 | Yes            | 4                 | Yes           | No             |
| 13               | 9                 | 4                 | Yes            | -                 | -             | -              |
| <b>Mean (SD)</b> | 15 (5)            | 7 (3)             | $p < 0.001$    | 9 (4)             | $p = 0.001$   | $p = 0.52$     |

PHQ: The Patient Health Questionnaire; SD: standard deviation; →: from baseline (B) to actual month; \* More than 0.5 SD at baseline (B) = 2.3; \*\* More than 0.5 SD at 3 months = 1.7.

**Table S3.** The Work and Social Adjustment Scale: sum score.

| Patient No. | WSAS Baseline | WSAS 3 Months | Change B → 3 * | WSAS 6 Months | Change B → 6 * | Change 3 → 6 ** |
|-------------|---------------|---------------|----------------|---------------|----------------|-----------------|
| 1           | 27            | 21            | Improved       | 24            | Improved       | Worse           |
| 2           | 19            | 15            | Improved       | 7             | Improved       | Improved        |
| 3           | 24            | 20            | Improved       | 17            | Improved       | Improved        |
| 4           | 25            | 5             | Improved       | 4             | Improved       | Unchanged       |
| 5           | 18            | 15            | Improved       | 8             | Improved       | Improved        |
| 6           | 23            | 11            | Improved       | 13            | Improved       | Unchanged       |
| 7           | 37            | 33            | Improved       | 35            | Unchanged      | Unchanged       |
| 8           | 25            | -             | -              | -             | -              | -               |
| 9           | 25            | 22            | Improved       | 21            | Improved       | Unchanged       |
| 10          | 28            | 25            | Improved       | 23            | Improved       | Unchanged       |
| 11          | 27            | 15            | Improved       | 18            | Improved       | Unchanged       |
| 12          | 20            | 9             | Improved       | 11            | Improved       | Unchanged       |
| 13          | 35            | 26            | Improved       | -             | -              | -               |
| Mean (SD)   | 25 (5)        | 17 (8)        | $p < 0.001$    | 17 (9)        | $p < 0.001$    | $p = 0.45$      |

WSAS: The Work and Social Adjustment Scale; SD: standard deviation; →: from baseline (B) to actual month; \* More than 0.5 SD at baseline = 2.65; \*\* More than 0.5 SD at 3 months = 3.95.

**Table S4.** The SF-36: Mental Composite Scale.

| Patient No. | MCS Baseline | MCS 3 Months | Change B → 3 * | MCS 6 Months | Change B → 6 * | Change 3 → 6 ** |
|-------------|--------------|--------------|----------------|--------------|----------------|-----------------|
| 1           | 58           | 50           | Worse          | 67           | Improved       | Improved        |
| 2           | 37           | 43           | Improved       | 45           | Unchanged      | Unchanged       |
| 3           | 22           | 34           | Improved       | 43           | Improved       | Improved        |
| 4           | 38           | 57           | Improved       | 52           | Improved       | Worse           |
| 5           | 21           | Not Complete | -              | -            | -              | -               |
| 6           | 22           | 51           | Improved       | 27           | Unchanged      | Worse           |
| 7           | 45           | 52           | Improved       | 52           | Improved       | Unchanged       |
| 8           | 33           | -            | -              | -            | -              | -               |
| 9           | 41           | 57           | Improved       | 40           | Unchanged      | Worse           |
| 10          | 43           | 51           | Improved       | 30           | Worse          | Worse           |
| 11          | 19           | 50           | Improved       | 44           | Improved       | Worse           |
| 12          | 24           | 48           | Improved       | 46           | Improved       | Unchanged       |
| 13          | 51           | 53           | Unchanged      | -            | -              | -               |
| Mean (SD)   | 35 (13)      | 50 (7)       | $p = 0.003$    | 45 (11)      | $p = 0.025$    | $p = 0.29$      |

SF-36: Short-Form Health Survey 36; \* More than 0.5 SD at baseline = 6.5; \*\* More than 0.5 SD at 3 months = 3.5.

**Table S5.** The SF-36: Physical Composite Scale.

| Patient No. | PCS Baseline | PCS 3 Months | Change B → 3 * | PCS 6 Months | Change B → 6 * | Change 3 → 6 ** |
|-------------|--------------|--------------|----------------|--------------|----------------|-----------------|
| 1           | 25           | 28           | Unchanged      | 24           | Unchanged      | Unchanged       |
| 2           | 39           | 60           | Improved       | 60           | Improved       | Unchanged       |
| 3           | 45           | 44           | Unchanged      | 50           | Improved       | Improved        |
| 4           | 34           | 47           | Improved       | 52           | Improved       | Unchanged       |
| 5           | 37           | Not Complete | -              | -            | -              | -               |
| 6           | 30           | 33           | Unchanged      | 32           | Unchanged      | Unchanged       |
| 7           | 25           | 26           | Unchanged      | 26           | Unchanged      | Unchanged       |
| 8           | 34           | -            | -              | -            | -              | -               |
| 9           | 36           | 34           | Unchanged      | 36           | Unchanged      | Unchanged       |
| 10          | 36           | 42           | Improved       | 50           | Improved       | Unchanged       |
| 11          | 45           | 49           | Unchanged      | 52           | Improved       | Unchanged       |
| 12          | 57           | 55           | Unchanged      | 54           | Unchanged      | Unchanged       |
| 13          | 40           | 30           | Worse          | -            | -              | -               |
| Mean (SD)   | 37 (9)       | 41 (11)      | $p = 0.20$     | 44 (13)      | $p = 0.04$     | $p = 0.16$      |

SF-36: Short-Form Health Survey 36; SD: standard deviation; \* More than 0.5 SD at baseline (B) = 4.5; \*\*

More than 0.5 SD at 3 months = 5.5.

**Table S6.** Correlations between various PROMS.

| Correlation Coefficient    |             |                |                |             |
|----------------------------|-------------|----------------|----------------|-------------|
| Spearman's rho at baseline | PHQ-9 SUM 0 | FQ Total Score | WSAS SUM 0     |             |
| PHQ-9 SUM 0                | 1.00        | 0.58 *         | 0.17           |             |
| FQ Total Score             | 0.58 *      | 1.00           | 0.17           |             |
| WSAS SUM 0                 | 0.17        | 0.17           | 1.00           |             |
| Spearman's rho at 6 months | WSAS SUM 6  | CSQ-8 SUM 6    | FQ Total Score | PHQ-9 SUM 6 |
| WSAS SUM 6                 | 1.00        | 0.40           | 0.62 *         | 0.76 **     |
| CSQ-8 SUM 6                | 0.40        | 1.00           | 0.72 *         | 0.54        |
| FQ Total Score             | 0.62 *      | 0.72 *         | 1.00           | 0.80 **     |
| PHQ-9 SUM 6                | 0.76 **     | 0.54           | 0.80 **        | 1.00        |

PHQ-9: Patient Health Questionnaire 9; FQ: Fatigue Questionnaire; WSAS: Work and Social Adjustment Scale; CSQ-8: Client Satisfaction 8; \* Correlation is significant at the 0.05 level (2-tailed); \*\* Correlation is significant at the 0.01 level (2-tailed).

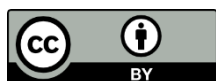

© 2021 by the authors. Licensee MDPI, Basel, Switzerland. This article is an open access article distributed under the terms and conditions of the Creative Commons Attribution (CC BY) license (<http://creativecommons.org/licenses/by/4.0/>).
